# Supplementary material for: A transcriptomic analysis of the effect of genistein on Sinorhizobium fredii HH103 reveals novel rhizobial genes putatively involved in symbiosis
Source: PubMed Central journal article supplement (PMC4990936; doi:10.1038/srep31592), 2016-08-19
Supplement: srep31592-s1.pdf [file srep31592-s1.pdf]

1 **A transcriptomic analysis of the effect of genistein on *Sinorhizobium fredii* HH103 reveals novel rhizobial genes**  
2 **putatively involved in symbiosis.**

3

4 **Authors:** Pérez-Montaña F, Jiménez-Guerrero I, Acosta-Jurado S, Navarro-Gómez P, Ollero FJ, Ruiz-Sainz JE, López-Baena FJ, Vinardell JM\*.

5

6 Departamento de Microbiología, Facultad de Biología, Universidad de Sevilla. Sevilla, Spain.

7

8 **Supplementary Information:**

9

10 **- Supplementary Tables**

11 **Table S1.** RNA-seq data validation using *q*RT-PCR.

12 **Table S2.** 36 and 35 *Sinorhizobium fredii* HH103 ORFs are regulated by genistein through *nod* (NB) and *tts* (TB) boxes respectively.

13 **Table S3.** 30 *Sinorhizobium fredii* HH103 ORFs are regulated by genistein but are not dependent on *nod* or *tts* boxes.

14 **- Supplementary Data 1.** General features of the total sequenced and mapped reads.

15 **- References cited in Supplementary Data 4.**

16

17 **Table S1. RNA-seq data validation using *q*RT-PCR (*q*PCR).** The expression of 19 individual genes was measured in the wild-type strain and  
 18 in its *nodDI* and *ttsI* mutant derivatives, both in the presence or absence of genistein. For *q*RT-PCR, fold-change values were calculated using  
 19 the  $\Delta\Delta C_t$  method and normalized to the reference 16S rRNA gene.

| Gene name   | Locus Tag / Promoter Sequences | RNA-seq   |                    |                   | <i>q</i> PCR |                    |                   |
|-------------|--------------------------------|-----------|--------------------|-------------------|--------------|--------------------|-------------------|
|             |                                | Wild-type | NodDI <sup>-</sup> | TtsI <sup>-</sup> | Wild-type    | NodDI <sup>-</sup> | TtsI <sup>-</sup> |
| -           | psfHH103d_373 / NB1            | 19.3      | 1.58               | 32.44             | 15.45        | 2.30               | 100.19            |
| <i>nodA</i> | psfHH103d_126 / NB8            | 17.65     | -1.59              | 14.68             | 30.31        | 1.49               | 20.42             |
| -           | psfHH103d_161 / NB10           | 21.58     | -1.26              | 22.37             | 15.85        | 2.34               | 33.05             |
| -           | psfHH103d_448 / NB13           | 27.06     | -1.15              | 28.73             | 171.06       | 2.48               | 144.34            |
| -           | psfHH103d_229 / NB14           | 37.99     | -1.21              | 23.89             | 39.26        | 1.59               | 89.26             |
| <i>y4wE</i> | psfHH103d_257 / NB15           | 24.69     | -1.3               | 31.5              | 63.79        | 1.37               | 118.87            |
| -           | psfHH103d_208 / NB17           | 17.43     | -1.31              | 39.14             | 25.93        | 1.81               | 86.62             |
| <i>syrM</i> | psfHH103d_367 / NB19           | 5.81      | -1.72              | 9.29              | 6.51         | 1.71               | 8.47              |
| <i>nopI</i> | SFHH103_04163 / TB2            | 3.13      | -1.22              | 1.82              | 24.82        | 2.39               | 2.06              |
| <i>gunA</i> | psfHH103d_292 / TB5            | 5.21      | -1.17              | 2.11              | 5.49         | 2.06               | 1.64              |
| <i>nopL</i> | psfHH103d_327 / TB9            | 4.56      | -2.85              | 2.31              | 43.01        | 1.9                | 1.84              |
| <i>nopC</i> | psfHH103d_3504 / TB12          | 6.29      | -2.52              | 1.63              | 22.52        | 2.14               | 2.33              |
| -           | psfHH103d_255 / -              | 3.39      | -1.14              | 3                 | 3.65         | 1.2                | 9.51              |
| -           | psfHH103d_275 / -              | 3.45      | -1.45              | 1.42              | 1.51         | -1.2               | -1.88             |
| -           | psfHH103d_306 / -              | 20.53     | 1.21               | 23.27             | 103.01       | 1.3                | 165.04            |
| <i>flgJ</i> | SFHH103_00346 / -              | 7.57      | -1.3               | 2.07              | 5.65         | -1.51              | -2.38             |
| -           | SFHH103_02192 / -              | 6.9       | -1.63              | 11.64             | 68.04        | -1.23              | 19.2              |
| -           | SFHH103_05321 / -              | 0.18      | 0.24               | 0.17              | 0.14         | 0.15               | 0.1               |
| <i>fbpA</i> | SFHH103_00387                  | 1.03      | 0.29               | 0.11              | 1.07         | 0.03               | 0.03              |

21 **Table S2.** 36 and 35 *Sinorhizobium fredii* HH103 ORFs are regulated by genistein through *nod* (NB) and *tts* (TB) boxes respectively<sup>a,b</sup>.

| NB/TB <sup>c</sup> | Locus-tag (gene name)                            | Functions (putative functions)                                                                                                                        | Fold change <sup>d</sup> |
|--------------------|--------------------------------------------------|-------------------------------------------------------------------------------------------------------------------------------------------------------|--------------------------|
| NB1                | psfHH103d_373 to 370                             | Hypothetical proteins (Carotenoid synthesis)                                                                                                          | 19.3 to 4.1              |
| NB2                | psfHH103d_381 to 379 ( <i>nodZnoeLnolK</i> )     | Fucosylation of LCOs                                                                                                                                  | 3.7 to 2.6               |
| NB8                | psfHH103d_126 to 132 ( <i>nodABCINolO'noeI</i> ) | Synthesis of LCOs backbone / LCO export / Methylation of LCOs                                                                                         | 17.7 to 2.4              |
| NB9                | psfHH103d_118, 116                               | Hypothetical proteins                                                                                                                                 | 10.3, 4.5                |
| NB10               | psfHH103d_161                                    | Hypothetical proteins (Polysaccharide inhibition)                                                                                                     | 21.6                     |
| NB13               | psfHH103d_448, 447                               | Hypothetical proteins (Gene expression regulation?)                                                                                                   | 27.1, 5.3                |
| NB14               | psfHH103d_229 to 224 ( <i>fixABCX</i> )          | Hypothetical proteins/ Electron transfer to nitrogenase                                                                                               | 38 to 6.3                |
| NB15               | psfHH103d_257 ( <i>y4wE</i> )                    | Indole Acetic Acid (IAA) biosynthesis                                                                                                                 | 24.7                     |
| NB17               | psfHH103d_208                                    | Hypothetical proteins (ABC-type transport)                                                                                                            | 17.4                     |
| NB18               | psfHH103d_323 ( <i>ttsI</i> ) to 326             | Transcriptional activator of the T3SS / Components of the T3SS apparatus / Conserved putative lipoprotein/(Transposase)                               | 10.1 to 1.5              |
| NB19               | psfHH103d_367 ( <i>syrM</i> ) to 369             | Transcriptional regulator of symbiotic genes / Hypothetical protein (Transcriptional regulator) / Hypothetical protein (Reduction of ethylene levels) | 5.8 to 2.7               |
| TB1                | SFHH103_04201 ( <i>nopM2</i> )                   | E3 ubiquitination                                                                                                                                     | 2.1                      |
| TB2                | SFHH103_04163 ( <i>nopI</i> ) to 04167           | Putative effector/Hypothetical proteins                                                                                                               | 3.7 to 3.1               |
| TB3                | psfHH103d_90 ( <i>nopM</i> )                     | E3 ubiquitination                                                                                                                                     | 2.2                      |
| TB4                | psfHH103d_287( <i>nopD</i> )                     | (C48 peptidase activity)                                                                                                                              | 7.7                      |
| TB5                | psfHH103d_292 ( <i>gunA</i> ), 293               | Cellulase activity /Hypothetical protein                                                                                                              | 5.2, 6.5                 |
| TB8                | SFHH103_335 ( <i>nopX</i> ) to 329               | Translocation of T3SS effectors/Hypothetical proteins                                                                                                 | 10.3 to 3.3              |
| TB9                | psfHH103d_327 ( <i>nopL</i> )                    | (Host MAPK signalling interference)                                                                                                                   | 4.6                      |

|      |                                                                  |                                                                                  |             |
|------|------------------------------------------------------------------|----------------------------------------------------------------------------------|-------------|
| TB10 | psfHH103d_337 to 348<br>( <i>nopBrhcInolUrhcLNQRSTU</i> )        | Components of the T3SS apparatus                                                 | 25.3 to 4.2 |
| TB11 | psfHH103d_349 ( <i>nopP</i> )                                    | (Host MAPK signalling interference)                                              | 5.5         |
| TB12 | psfHH103d_3504, 3506, 351 to 353<br>( <i>nopCAy4yPrhcVy4yS</i> ) | Effector protein/Component of the T3SS apparatus/Component of the T3SS apparatus | 7.2 to 4.8  |
| TB13 | psfHH103d_363( <i>nopT</i> )                                     | C46 peptidase activity                                                           | 4.5         |

22 <sup>a</sup> Genes driven by NB are dependent on NodD1. Genes driven by TB are dependent on both NodD1 and TtsI.

23 <sup>b</sup> With the exception of genes linked to TB1 and TB2, all these genes are located on the pSym (pl. d, pSfHH103d).

24 <sup>c</sup> According to Vinardell et al. [20].

25 <sup>d</sup> Fold induction with respect to non-induced cultures. In operons, the first and second values correspond to the first and last gene of the transcriptional unit respectively.

26

27 **Table S3.** 30 *Sinorhizobium fredii* HH103 ORFs are regulated by genistein but are not dependent on *nod* or *tts* boxes.

|                                                               |                                                                                                                                                                                                                                                                                               |
|---------------------------------------------------------------|-----------------------------------------------------------------------------------------------------------------------------------------------------------------------------------------------------------------------------------------------------------------------------------------------|
| <p><b>17 genes depending on NodD1 (12/5)<sup>a</sup></b></p>  | <p><b>Induced:</b><br/>SFHH103_00841 (<i>ligE</i>), SFHH103_02192, SFHH103_06013, psfHH103d_255, psfHH103d_306 to 311, psfHH103d_322 to 319 (including <i>nodD2</i>)</p> <p><b>Repressed:</b><br/>SFHH103_00450, SFHH103_00451, SFHH103_00799, SFHH103_01317, SFHH103_02323 (<i>hmuU</i>)</p> |
| <p><b>7 genes depending on NodD1 and TtsI (7/0)</b></p>       | <p><b>Induced:</b><br/>SFHH103_00346 (<i>flgJ</i>) to 00348, SFHH103_00844, SFHH103_01920, psfHH103d_275 and psfHH103d_274</p>                                                                                                                                                                |
| <p><b>6 genes no depending on NodD1 and/or TtsI (3/3)</b></p> | <p><b>Induced:</b><br/>SFHH103_03274<sup>b</sup>, SFHH103_03749<sup>c</sup>, SFHH103_03875</p> <p><b>Repressed:</b><br/>SFHH103_05321 to 05319</p>                                                                                                                                            |

28 <sup>a</sup> The number of genes induced/repressed is shown between brackets.

29 <sup>b</sup> The induction of this genes was 3.0, 2.4, and 2.7 in the wt, *nodD1* and *ttsI* backgrounds respectively.

30 <sup>c</sup> This gene only shows partial induction in the *ttsI* mutant background

31

**Supplementary Data 1. General features of the total sequenced and mapped reads.**

**Total Number of Reads:** Reads were mapped and pair using a Bayesian inference using Cufflinks v2.11 software. Worst quality reads were removed by means of Picard Tools.

| <b>Sample condition</b>   | <b>#Mapped Reads</b> | <b>High Quality Mapped Reads</b> | <b>Properly Pair</b> |
|---------------------------|----------------------|----------------------------------|----------------------|
| Wild-type_1               | 43,514,666           | 41,856,055                       | 40,447,758           |
| Wild-type_2               | 47,976,366           | 46,001,800                       | 43,889,282           |
| Wild-type_GEN_1           | 41,545,412           | 39,919,415                       | 38,189,900           |
| Wild-type_GEN_2           | 44,649,058           | 43,054,550                       | 41,288,654           |
| NodD1 <sup>-</sup> _1     | 42,853,472           | 40,660,931                       | 38,861,148           |
| NodD1 <sup>-</sup> _2     | 39,211,312           | 37,460,139                       | 35,672,278           |
| NodD1 <sup>-</sup> _GEN_1 | 43,075,850           | 41,447,019                       | 39,962,702           |
| NodD1 <sup>-</sup> _GEN_2 | 44,443,662           | 42,776,374                       | 40,794,302           |
| TtsI <sup>-</sup> _1      | 46,494,272           | 44,688,429                       | 43,212,764           |
| TtsI <sup>-</sup> _2      | 46,671,594           | 38,746,887                       | 35,760,244           |
| TtsI <sup>-</sup> _GEN_1  | 41,472,444           | 39,520,075                       | 37,767,084           |
| TtsI <sup>-</sup> _GEN_2  | 45,623,306           | 13,074,049                       | 12,332,926           |

Two biological and independent experiments were carried out for each condition.

**Quality Read Controls:** Three different controls were performed to ensure the quality of reads: GC content, duplicate distribution and distribution respect genetic coordinates.

- *GC content:* distribution of GC content on mapped reads. A normal distribution around 45-55% is expected.

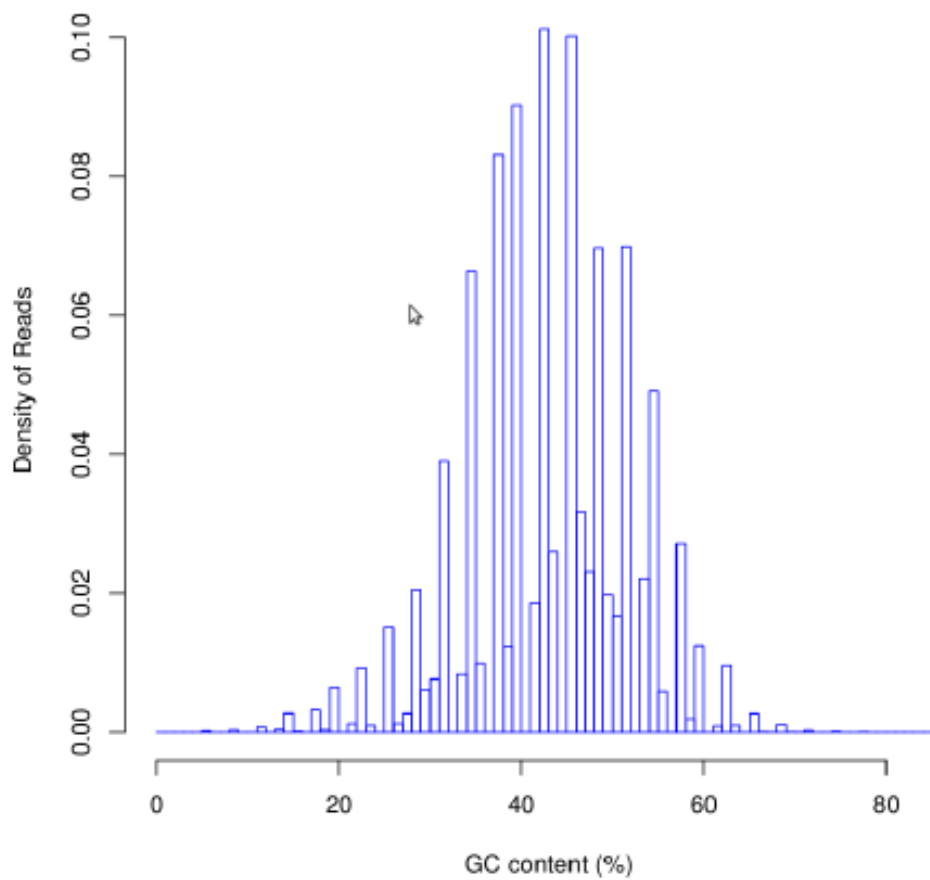

- *Duplicate distribution*: common distribution of duplicates in a RNA-Seq experiment shows a small number of reads with high levels of duplicates and a high number of reads with low levels of duplicates. All samples presented optimal values of duplicate distributions.

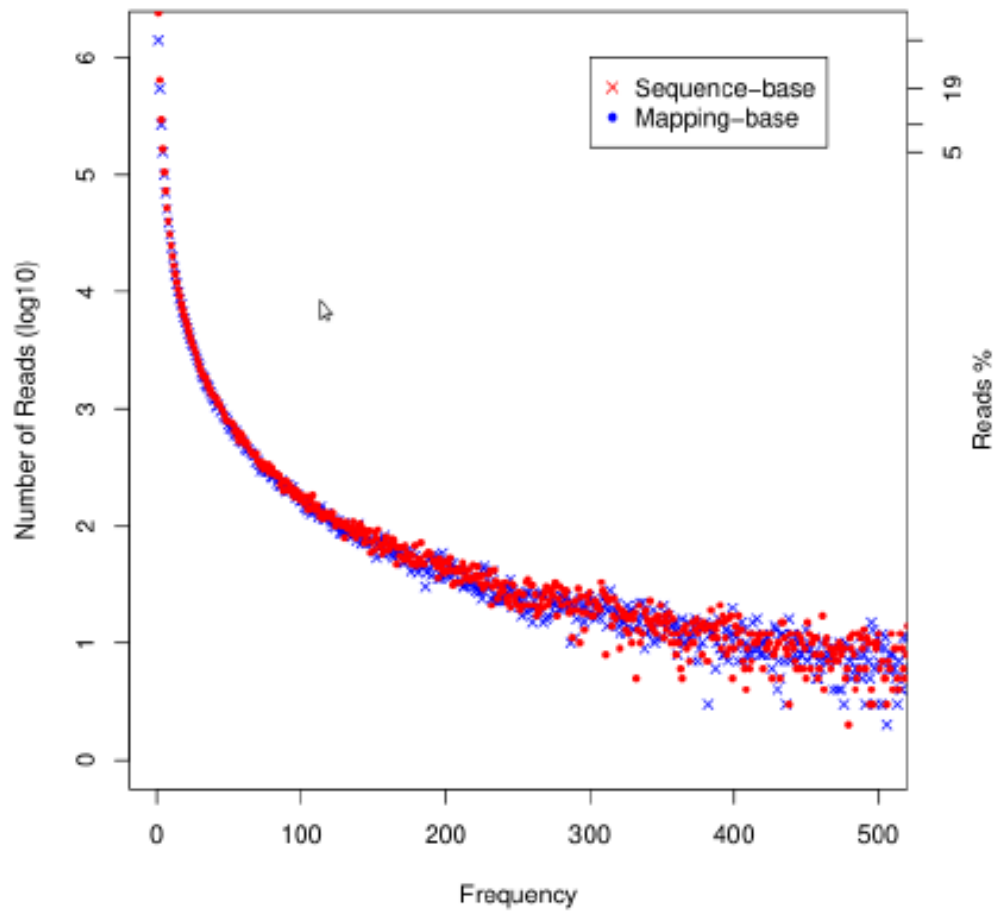



- *Distribution respect genetic coordinates*: centralization around 50 percentile of gene body is expected in high quality samples. Read concentration in both ends could be indicative of RNA degradation.

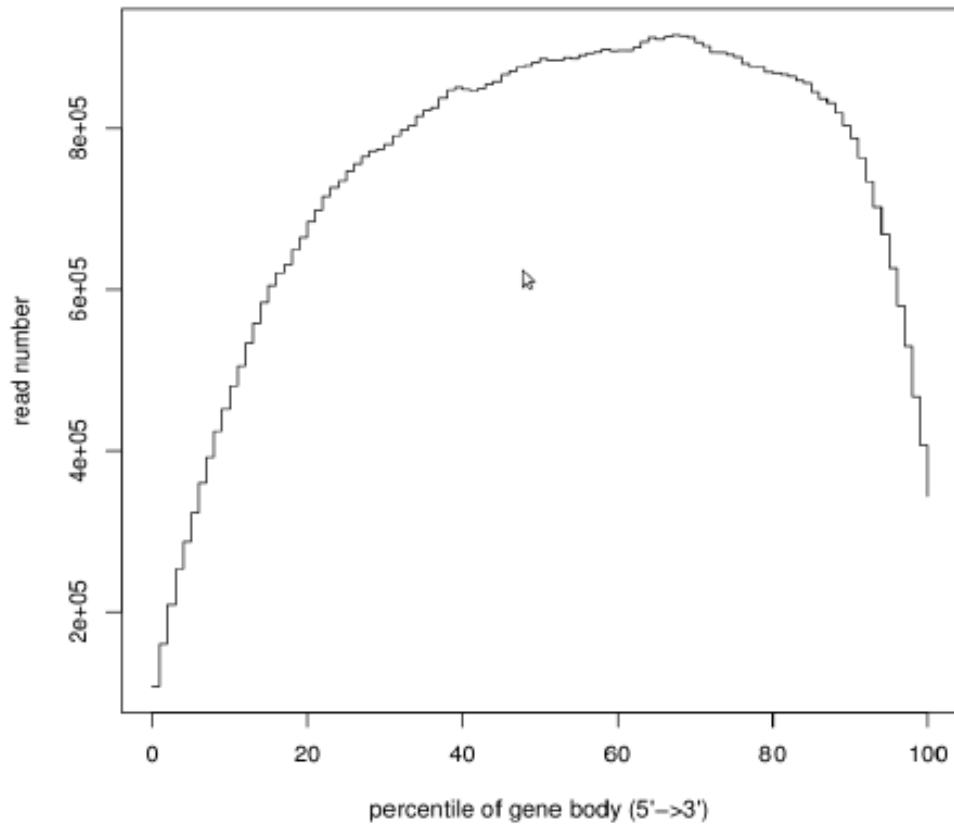

**Normalization:** normalization is needed to avoid statistical deviations due to differences in library sizes.

Number of reads per gene **before** normalization.

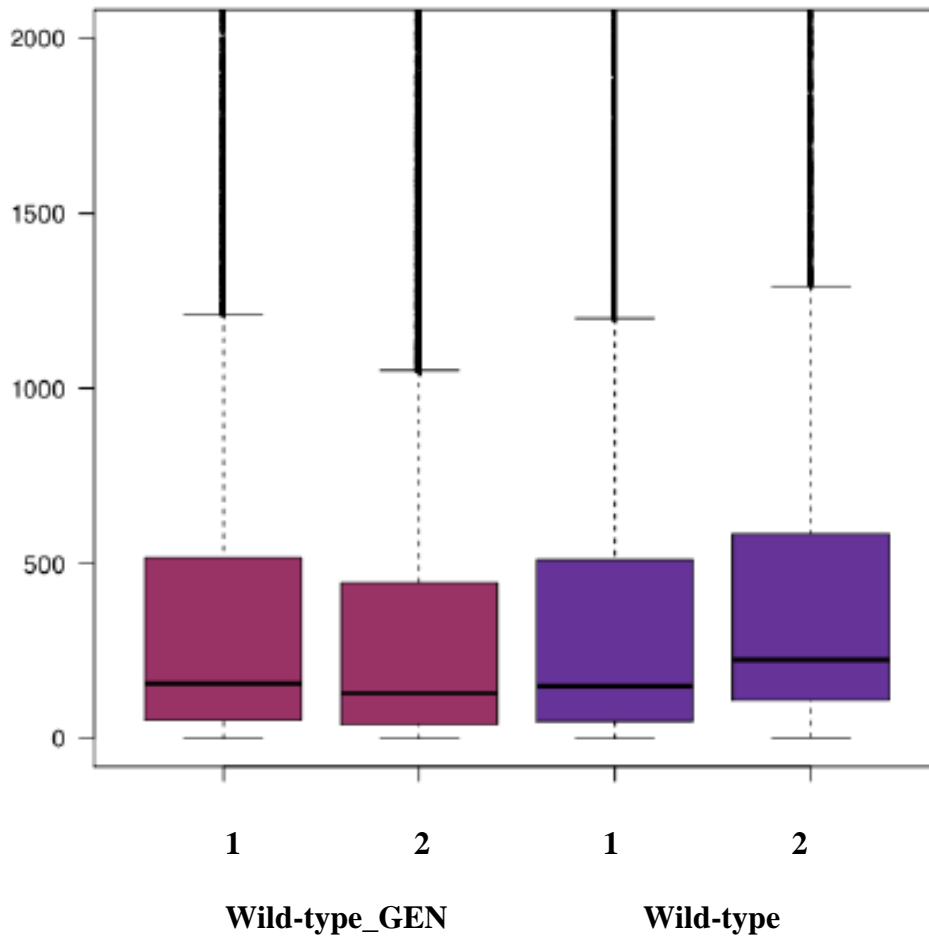

Number of reads per gene **before** normalization.

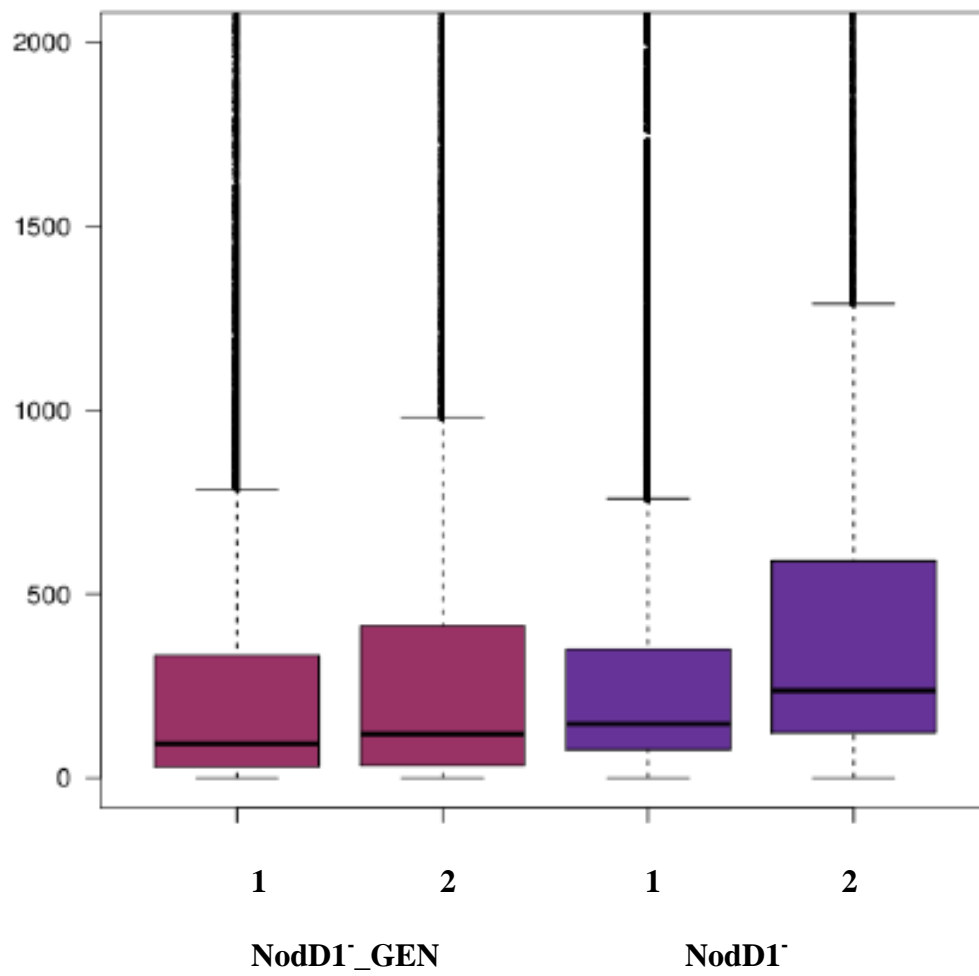

Number of reads per gene **before** normalization.

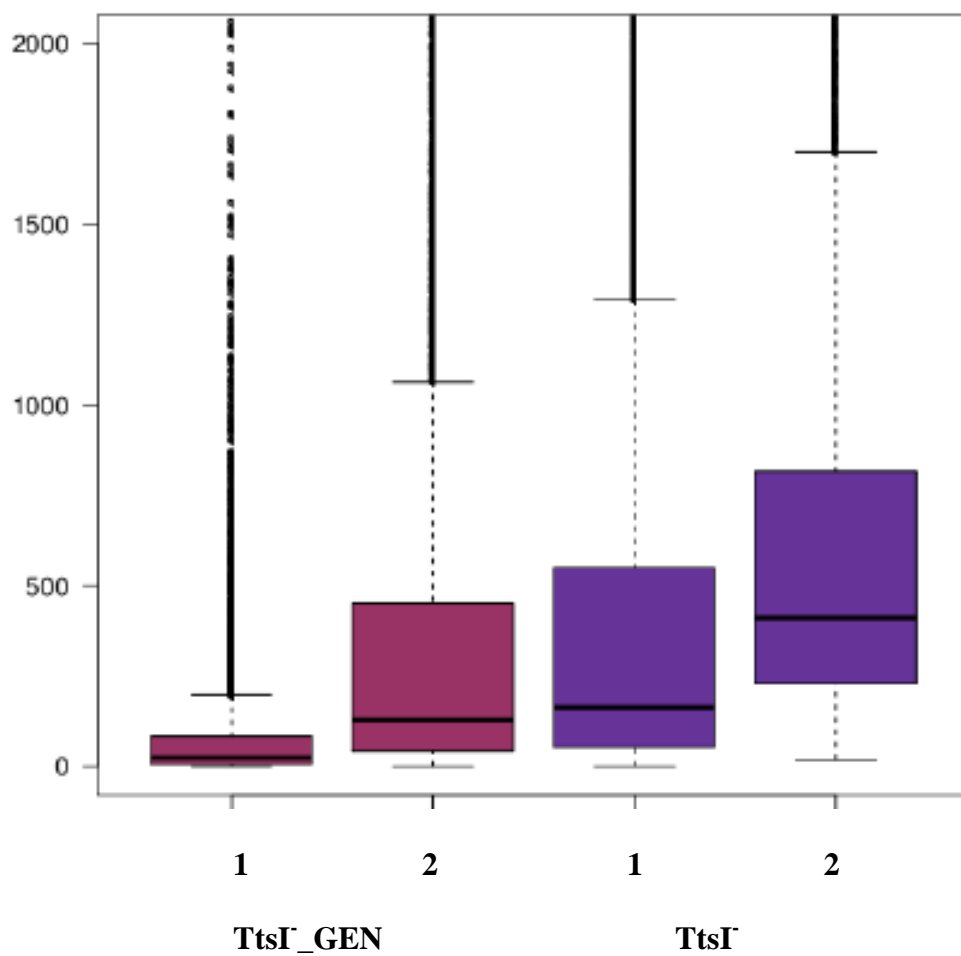

Number of reads per gene **after** normalization.

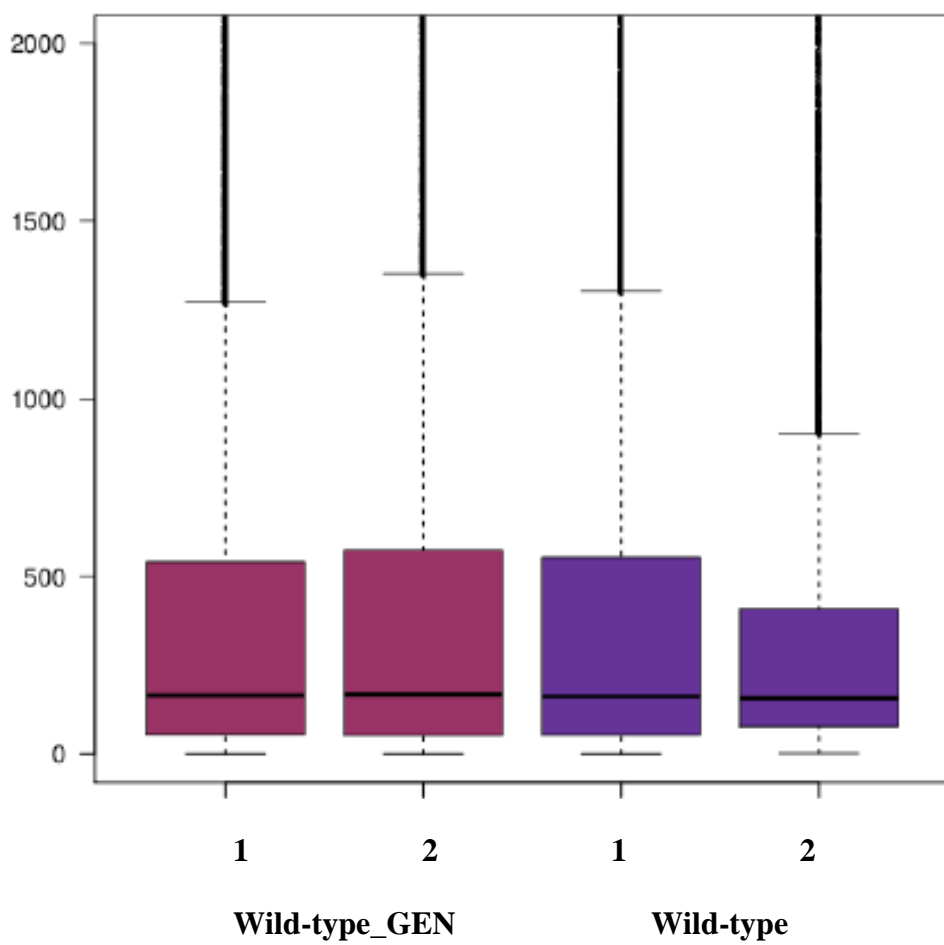

Number of reads per gene **after** normalization.

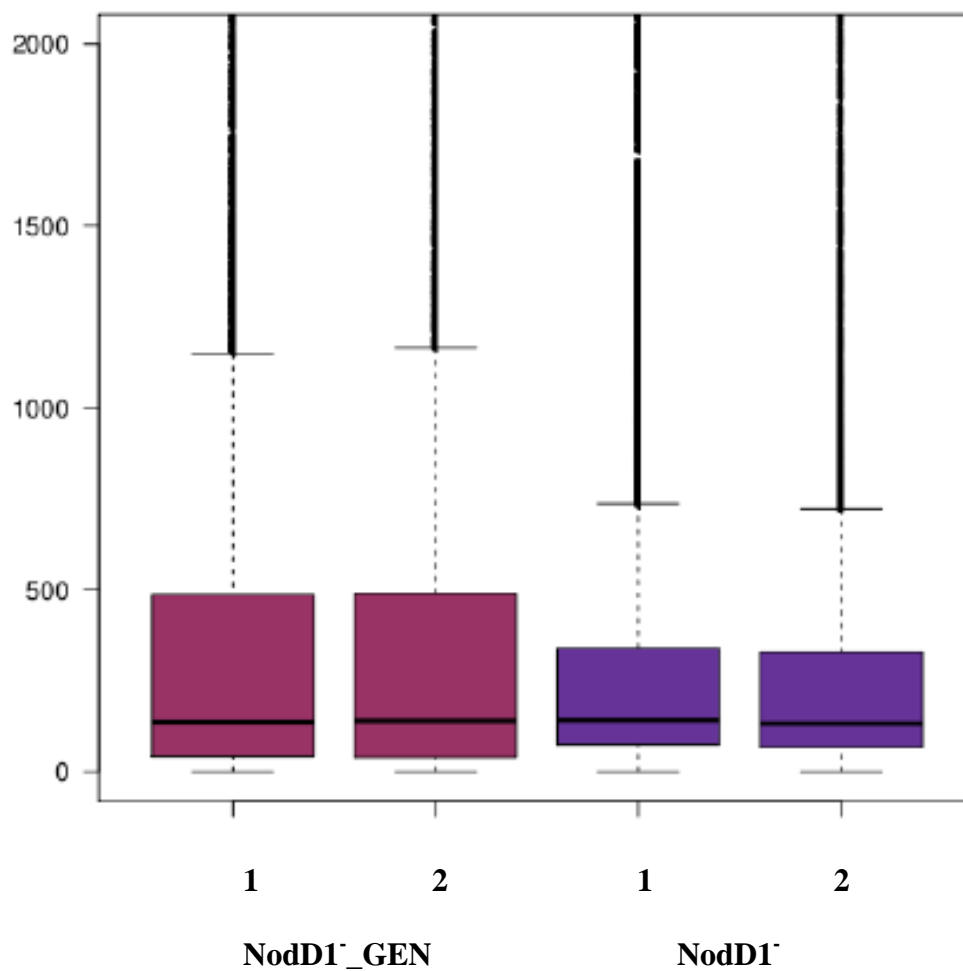

Number of reads per gene **after** normalization.

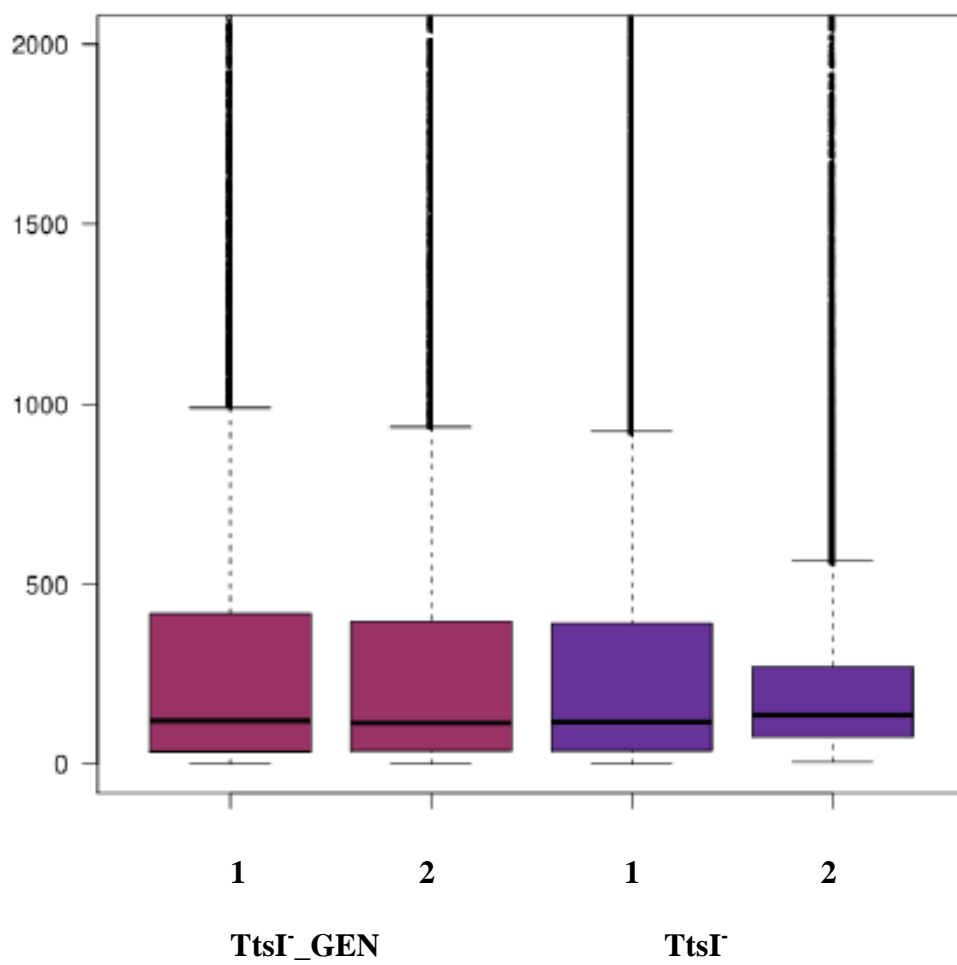

1 **References cited in Supplementary Data 4**

- 2 Ausmees, N. et al. Characterization of NopP, a type III secreted effector of *Rhizobium*  
3 sp. strain NGR234. *J. Bacteriol.* **186**, 4774-4780 (2004).
- 4 Bartsev, A. V., Boukli, N. M., Deakin, W. J., Staehelin, C. & Broughton, W. J.  
5 Purification and phosphorylation of the effector protein NopL from *Rhizobium* sp.  
6 NGR234. *FEBS Lett.* **554**, 271-274 (2003).
- 7 Bartsev, A. V. et al. NopL, an effector protein of *Rhizobium* sp. NGR234, thwarts  
8 activation of plant defense reactions. *Plant Physiol.* **134**, 871-879 (2004).
- 9 Bellato, C., Krishnan, H. B., Cubo, T., Temprano, F. & Pueppke, S. G. The soybean  
10 cultivar specificity gene *nolX* is present, expressed in a *nodD*-dependent manner, and of  
11 symbiotic significance in cultivar-nonspecific strains of *Rhizobium* (*Sinorhizobium*)  
12 *fredii*. *Microbiology.* **143**, 1381-1388 (1997).
- 13 Caldelari Baumberger, I., Fraefel, N., Göttfert, M. & Hennecke, H. New NodW- or  
14 NifA-regulated *Bradyrhizobium japonicum* genes. *Mol. Plant Microbe Interact.* **16**, 342-  
15 351 (2003).
- 16 Dai, W. J., Zeng, Y., Xie, Z. P. & Staehelin, C. Symbiosis-promoting and deleterious  
17 effects of NopT, a novel type 3 effector of *Rhizobium* sp. strain NGR234. *J. Bacteriol.*  
18 **190**, 5101-110 (2008).
- 19 de Lyra, Mdo C. et al. Inactivation of the *Sinorhizobium fredii* HH103 *rhcJ* gene  
20 abolishes nodulation outer proteins (Nops) secretion and decreases the symbiotic  
21 capacity with soybean. *Int. Microbiol.* **9**, 125-133 (2006).



22 Deakin, W. J., Marie, C., Saad, M. M., Krishnan, H. B. & Broughton, W. J. NopA is  
23 associated with cell surface appendages produced by the type III secretion system of  
24 *Rhizobium* sp. strain NGR234. Mol. Plant Microbe Interact. **18**, 499-507 (2005).

25 Earl, C. D., Ronson, C. W. & Ausubel, F. M. Genetic and structural analysis of the  
26 *Rhizobium meliloti* *fixA*, *fixB*, *fixC*, and *fixX* genes. J. Bacteriol. **169**, 1127-1136 (1987).

27 Hubber, A., Vergunst, A. C., Sullivan, J. T., Hooykaas, P. J. & Ronson, C. W.  
28 Symbiotic phenotypes and translocated effector proteins of the *Mesorhizobium loti*  
29 strain R7A VirB/D4 type IV secretion system. Mol Microbiol. **54**, 561-574 (2004).

30 Jabbouri, S, et al. *nolO* and *noeI* (HsnIII) of *Rhizobium* sp. NGR234 are involved in 3-  
31 O-carbamoylation and 2-O-methylation of Nod factors. J. Biol. Chem. **273**, 12047-  
32 12055 (1988).

33 Jiang, G. & Krishnan, H. B. *Sinorhizobium fredii* USDA257, a cultivar-specific soybean  
34 symbiont, carries two copies of *y4yA* and *y4yB*, two open reading frames that are  
35 located in a region that encodes the type III protein secretion system. Mol. Plant  
36 Microbe Interact. **13**, 1010-1014 (2000).

37 Jiménez-Guerrero, I., Pérez-Montaña, F., Medina, C., Ollero, F. J. & López-Baena, F. J.  
38 NopC is a *Rhizobium*-specific type 3 secretion system effector secreted by  
39 *Sinorhizobium (Ensifer) fredii* HH103. PLoS One **10**, e0142866 (2015).

40 Kambara, K. et al. Rhizobia utilize pathogen-like effector proteins during symbiosis.  
41 Mol. Microbiol. **71**, 92-106 (2009).

42 Kim, W. S. & Krishnan, H. B. A *nopA* deletion mutant of *Sinorhizobium fredii*  
43 USDA257, a soybean symbiont, is impaired in nodulation. Curr. Microbiol. **68**, 239-246  
44 (2014).

45 Kondorosi, E. et al. Involvement of the *syrM* and *nodD3* genes of *Rhizobium meliloti* in  
46 *nod* gene activation and in optimal nodulation of the plant host. *Mol Microbiol.* **5**, 3035-  
47 3048 (1991).

48 Kovács, L. G., Balatti, P. A., Krishnan, H. B. & Pueppke, S. G. Transcriptional  
49 organization and expression of *noIXWBTUV*, a locus that regulates cultivar-specific  
50 nodulation of soybean by *Rhizobium fredii* USDA257. *Mol Microbiol.* **17**, 923-933  
51 (1995).

52 Krishnan, H. B. & Pueppke, S. G. Flavonoid inducers of nodulation genes stimulate  
53 *Rhizobium fredii* USDA257 to export proteins into the environment. *Mol. Plant Microbe*  
54 *Interact.* **6**, 107-113 (1993).

55 Krishnan, H. B. et al. Extracellular proteins involved in soybean cultivar-specific  
56 nodulation are associated with pilus-like surface appendages and exported by a type III  
57 protein secretion system in *Sinorhizobium fredii* USDA257. *Mol. Plant Microbe*  
58 *Interact.* 2003 **16**, 617-625 (2003).

59 Kulkarni, G. et al. Specific hopanoid classes differentially affect free-living and  
60 symbiotic states of *Bradyrhizobium diazoefficiens*. *MBio.* **6**, 5 (2015).

61 Lamrabet, Y. et al. Mutation in GDP-fucose synthesis genes of *Sinorhizobium fredii*  
62 alters Nod factors and significantly decreases competitiveness to nodulate soybeans.  
63 *Mol. Plant Microbe Interact.* **12**, 207-217 (1999).

64 López-Baena, F. J. et al. Regulation and symbiotic significance of nodulation outer  
65 proteins secretion in *Sinorhizobium fredii* HH103. *Microbiology* **154**, 1825-1836  
66 (2008).

67 López-Baena, F. J. et al. The absence of Nops secretion in *Sinorhizobium fredii* HH103  
68 increases GmPR1 expression in Williams soybean. *Mol. Plant Microbe Interact.* **22**,  
69 1445-1454 (2009).

70 Lorio, J. C., Kim, W. S. & Krishnan, H. B. NopB, a soybean cultivar-specificity protein  
71 from *Sinorhizobium fredii* USDA257, is a type III secreted protein. *Mol. Plant Microbe*  
72 *Interact.* **17**, 1259-1268 (2004).

73 Lorio, J. C., Chronis, D. & Krishnan, H. B. Y4xP, an open reading frame located in a  
74 type III protein secretion system locus of *Sinorhizobium fredii* USDA257 and  
75 USDA191, encodes cysteine synthase. *Mol. Plant Microbe Interact.* **19**, 635-643 (2006).

76 Madinabeitia, N. et al. *Sinorhizobium fredii* HH103 has a truncated *nolO* gene due to a -  
77 1 frameshift mutation that is conserved among other geographically distant *S. fredii*  
78 strains. *Mol. Plant-Microbe Interact.* **15**, 150-159 (2002).

79 Marie, C. et al. Characterization of Nops, nodulation outer proteins, secreted via the  
80 type III secretion system of NGR234. *Mol. Plant Microbe Interact.* **16**, 743-751 (2003).

81 Meinhardt, L. W., Krishnan, H. B., Balatti, P. A. & Pueppke, S. G. Molecular cloning  
82 and characterization of a sym plasmid locus that regulates cultivar-specific nodulation  
83 of soybean by *Rhizobium fredii* USDA257. *Mol Microbiol.* **9**, 17-29 (1993).

84 Mercante, V. et al. The absence of protein Y4yS affects negatively the abundance of  
85 T3SS *Mesorhizobium loti* secretin, RhcC2, in bacterial membranes. *Front. Plant Sci.* **6**,  
86 12 (2015).

87 Miller, S.H. , Elliot, R. M., Sullivan, J. T. & Ronson, C. W. Host-specific regulation of  
88 symbiotic nitrogen fixation in *Rhizobium leguminosarum* biovar *trifolii*. *Microbiology.*  
89 **153**, 3184-3195 (2007).

90 Okazaki, S., Kaneko, T., Sato, S. & Saeki, K. Hijacking of leguminous nodulation  
91 signaling by the rhizobial type III secretion system. Proc. Natl. Acad. Sci. USA. **110**,  
92 17131-17136 (2013).

93 Oldroyd, G. E. Speak, friend, and enter: signaling systems that promote beneficial  
94 symbiotic associations in plants. Nat. Rev. Microbiol. **11**, 252-263 (2013).

95 Silipo, A. et al. Covalently linked hopanoid-lipid A improves outer-membrane  
96 resistance of a *Bradyrhizobium* symbiont of legumes. Nat. Commun. **5**, 5106 (2014).

97 Skorpil, P. et al. NopP, a phosphorylated effector of *Rhizobium* sp. strain NGR234, is a  
98 major determinant of nodulation of the tropical legumes *Flemingia congesta* and  
99 *Tephrosia vogelii*. Mol. Microbiol. **57**, 1304-1317 (2005).

100 Staehelin, C. & Krishnan, H. B. Nodulation outer proteins: double-edged swords of  
101 symbiotic rhizobia. Biochem. J. **470**, 263-274 (2015).

102 Theunis, M., Kobayashi, H., Broughton, W. J. & Prinsen, E. Flavonoids, NodD1,  
103 NodD2, and *nod*-box NB15 modulate expression of the *y4wEFG* locus that is required  
104 for Indole-3-Acetic Acid Synthesis in *Rhizobium* sp. strain NGR234. Mol. Plant  
105 Microbe Interact. **17**, 1153-1161 (2004).

106 Tittabutr, P., Awaya, J. D., Li, Q. X. & Borthakur, D. The cloned 1-aminocyclopropane-  
107 1-carboxylate (ACC) deaminase gene from *Sinorhizobium* sp. strain BL3 in *Rhizobium*  
108 sp. strain TAL1145 promotes nodulation and growth of *Leucaena leucocephala*. Syst.  
109 Appl. Microbiol. **31**, 141-150 (2008).

110 Tsurumaru, H. et al. A Putative Type III Secretion System Effector Encoded by the  
111 MA20\_12780 Gene in *Bradyrhizobium japonicum* Is-34 Causes Incompatibility with  
112 Rj4 Genotype Soybeans. Appl. Environ. Microbiol. **81**, 5812-5819 (2015).

113 van Rhijn, P. & Vanderleyden, J. The *Rhizobium*-plant symbiosis. Microbiol. Rev. **59**,  
114 124-142 (1995).

115 Viprey, V., Del Greco, A., Golinowski, W., Broughton, W. J. & Perret, X. Symbiotic  
116 implications of type III protein secretion machinery in *Rhizobium*. Mol. Microbiol. **28**,  
117 1381-1389 (1998).

118 Xin, D. W. et al. Functional analysis of NopM, a novel E3 ubiquitin ligase (NEL)  
119 domain effector of *Rhizobium* sp. strain NGR234. PLoS Pathog. **8**, e1002707 (2012).

120 Zhang, L., Chen, X. J., Lu, H. B., Xie, Z. P. & Staehelin, C. Functional analysis of the  
121 type 3 effector nodulation outer protein L (NopL) from *Rhizobium* sp. NGR234:  
122 symbiotic effects, phosphorylation, and interference with mitogen-activated protein  
123 kinase signaling. J. Biol. Chem. 2011 **286**, 32178-32187 (2011).
